# Supplementary material for: Bottom-up deposition of lithium on 3D lithiophobic–lithiophilic host for long-life lithium metal anodes
Source: Royal Society of Chemistry journal article supplement (doi:10.1039/d4ta02002b), 2024-01-01
Supplement: d4ta02002b1.pdf [file d4ta02002b1.pdf]

## Supporting Information

### **Bottom-up deposition lithium into 3D lithiophobic-lithiophilic host for long-life lithium metal anodes**

Bendong Huang, Ziwei Cai, Tao Peng, Yingxiang Tan, Nan Zhang, Wei Liu, Hai Zhong\*, and Yaohua Mai\*

Institute of New Energy Technology, College of Physics and Optoelectronic Engineering, Jinan University, Guangzhou 510006, China

\*E-mail: haizhong@jnu.edu.cn (H. Zhong), yaohuamai@jnu.edu.cn (Y. Mai)

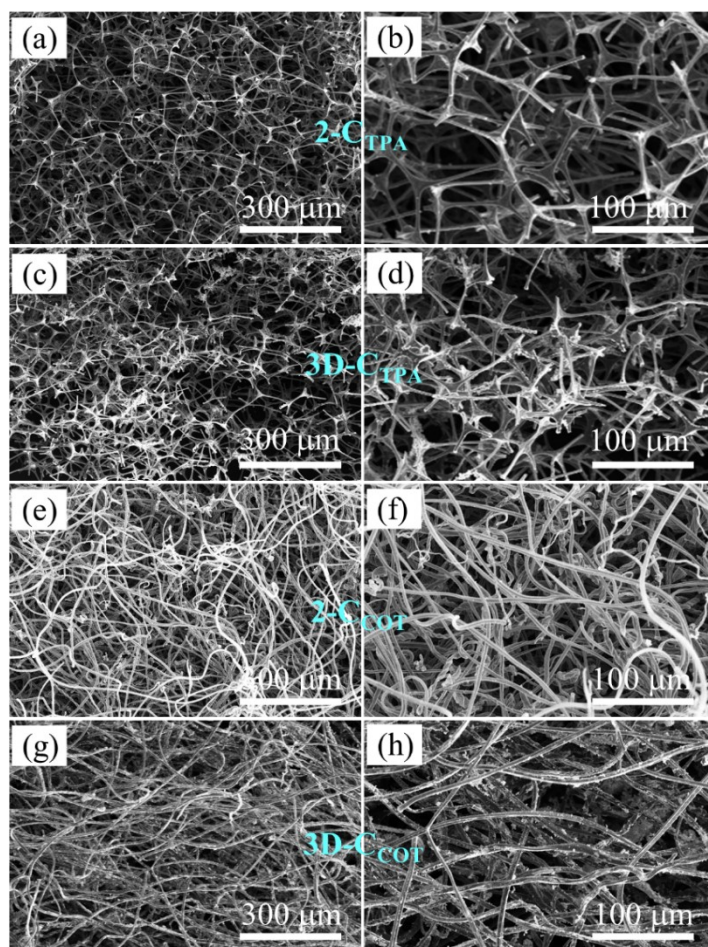

**Fig. S1.** SEM images of the (a, b) 2-C<sub>TPA</sub>, (c, d) 3D-C<sub>TPA</sub>, (e, f) 2-C<sub>COT</sub>, and (g, h) 3D-C<sub>COT</sub> skeletons.

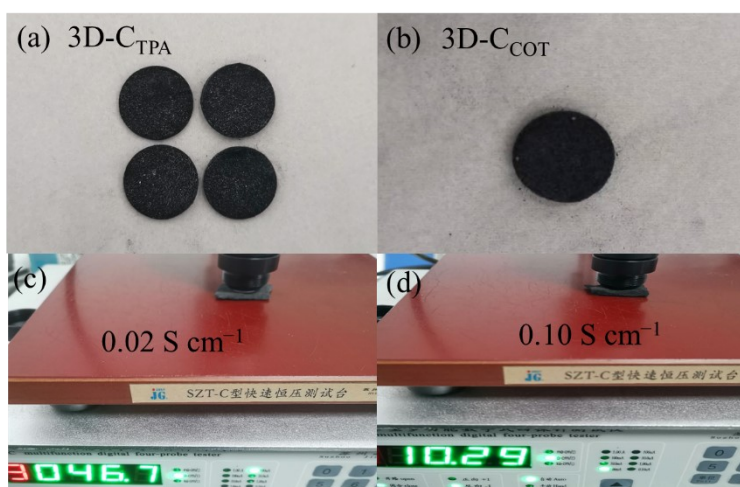

**Fig. S2.** Photographs of (a) 3D-C<sub>TPA</sub> and (b) 3D-C<sub>COT</sub> skeletons; Corresponding conductivities of (c) 3D-C<sub>TPA</sub> and (d) 3D-C<sub>COT</sub> skeletons.

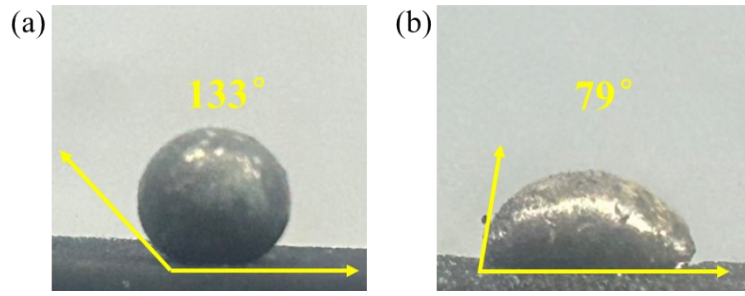

**Fig. S3.** Optical images of lithium droplet on (a) 2-C<sub>TPA</sub> skeleton and (b) 3D-C<sub>TPA</sub> skeleton substrates.

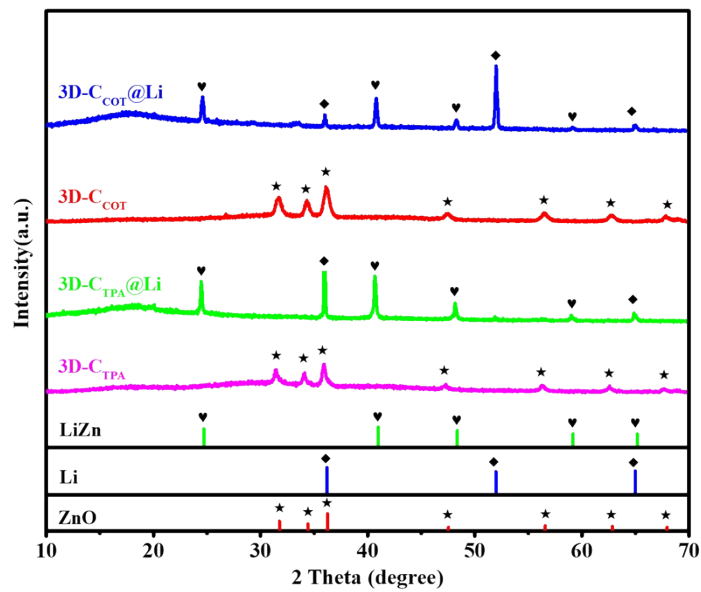

**Fig. S4.** XRD pattern of 3D-C<sub>TPA</sub> skeleton, 3D-C<sub>TPA</sub>@Li anode, 3D-C<sub>COT</sub> skeleton, and 3D-C<sub>COT</sub>@Li anode.

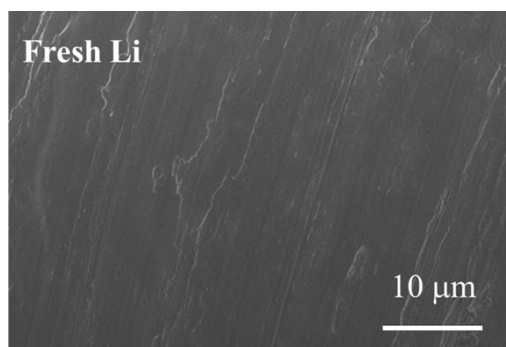

**Fig. S5.** Top-view SEM image of the fresh bare Li anode.

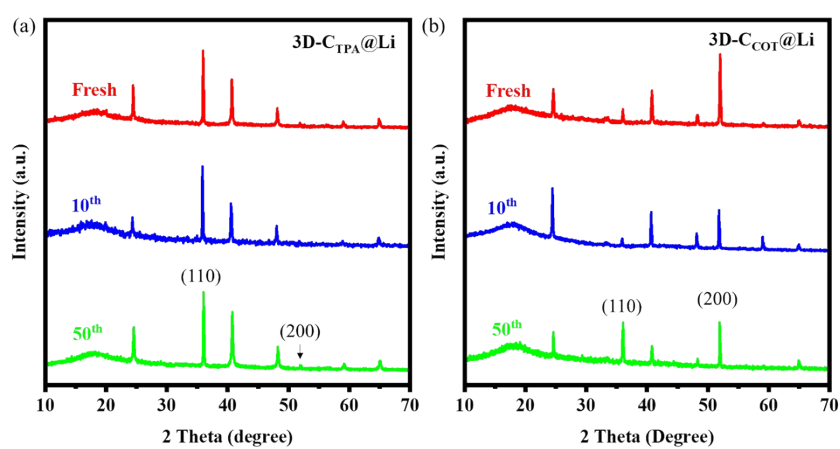

**Fig. S6** The XRD patterns of the symmetrical cells with (a) 3D-C<sub>TPA</sub>@Li anode and (b) 3D-C<sub>COT</sub>@Li anode cycled at a current density of 1 mA·cm<sup>-2</sup> and a capacity of 1 mAh·cm<sup>-2</sup>.

**Table S1** The heights of the Li(110) peak and Li(200) peak in the corresponding XRD patterns of Fig. S6.

|                         |                  | Li(110) | Li(200) |
|-------------------------|------------------|---------|---------|
| 3D-C <sub>TPA</sub> @Li | Fresh            | 1332    | 74      |
|                         | 10 <sup>th</sup> | 420     | 25      |
|                         | 50 <sup>th</sup> | 1203    | 67      |
| 3D-C <sub>COT</sub> @Li | Fresh            | 232     | 1270    |
|                         | 10 <sup>th</sup> | 211     | 1134    |
|                         | 50 <sup>th</sup> | 495     | 560     |

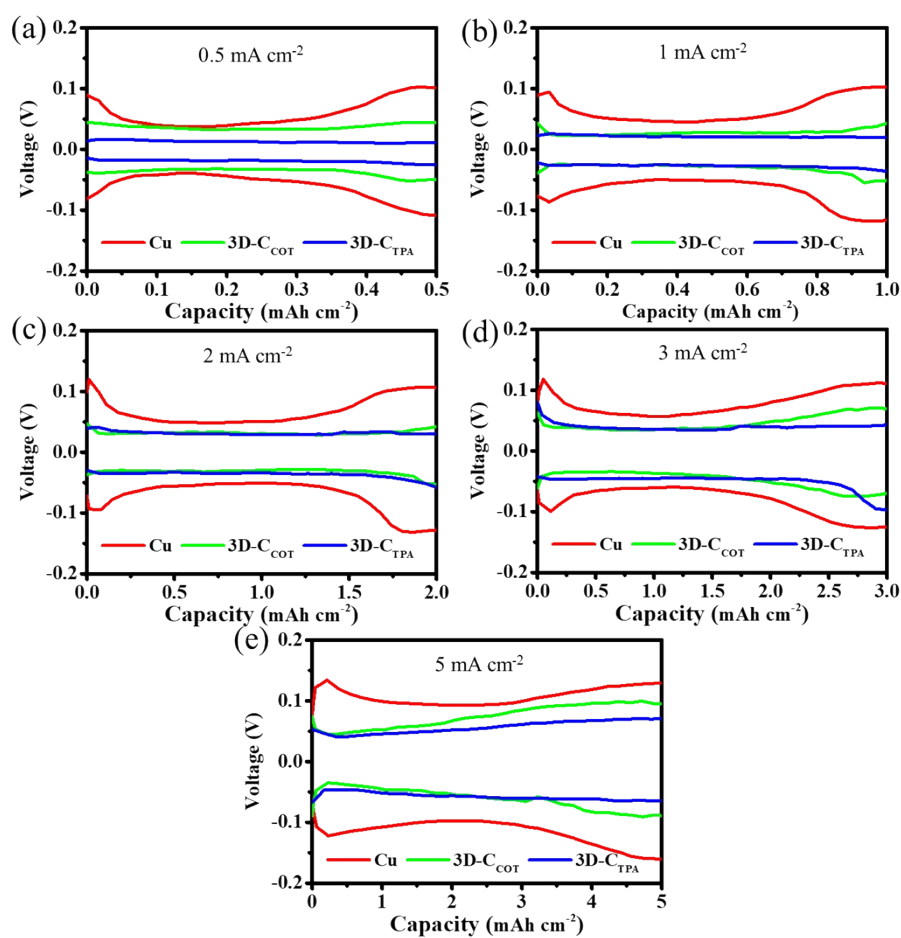

**Fig. S7.** Corresponding voltage-capacity profiles at current densities of (a) 0.5 mA cm<sup>-2</sup>, (b) 1 mA cm<sup>-2</sup>, (c) 2 mA cm<sup>-2</sup>, (d) 3 mA cm<sup>-2</sup>, and (e) 5 mA cm<sup>-2</sup> in Fig. 2i.

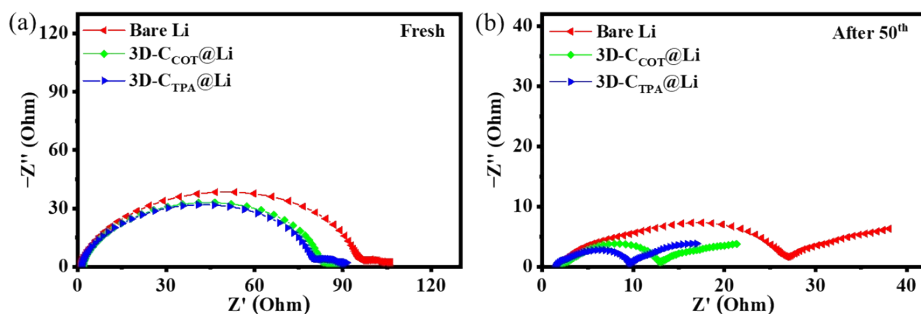

**Fig. S8.** EIS of the 3D-C<sub>TPA</sub>@Li, 3D-C<sub>COT</sub>@Li, and bare Li anodes (d) before and (e) after 50 cycles.

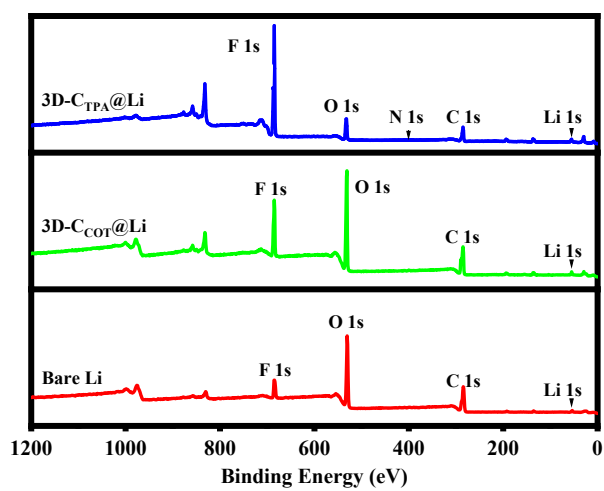

**Fig. S9.** XPS survey spectra of bare Li, 3D-C<sub>COT</sub>@Li, and 3D-C<sub>TPA</sub>@Li anode after 50 cycles.

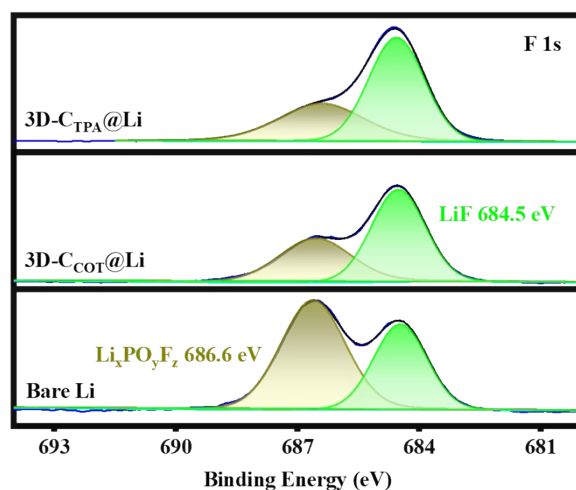

**Fig. S10.** High-resolution XPS plots of the F1s of bare Li, 3D-C<sub>COT</sub>@Li, and 3D-C<sub>TPA</sub>@Li anode after 50 cycles.

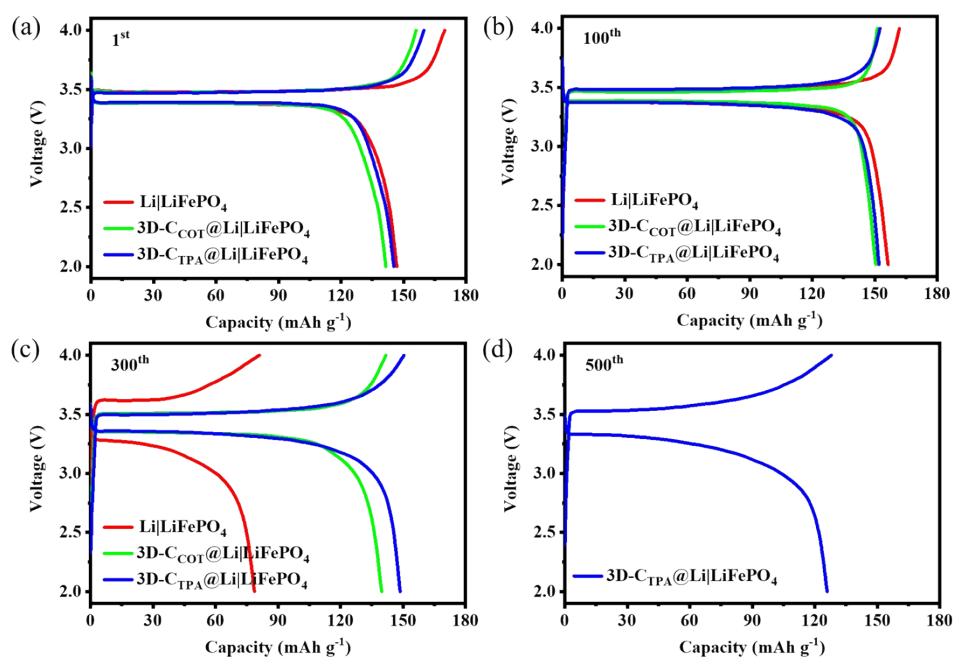

**Fig. S11.** Corresponding voltage–capacity profiles of these cells at selected cycles in Fig. 5a.
